# Supplementary material for: In vivo Environment Swiftly Restricts Human Pancreatic Progenitors Toward Mono-Hormonal Identity via a HNF1A/HNF4A Mechanism
Source: Front Cell Dev Biol. 2020 Feb 25;8:109. doi: 10.3389/fcell.2020.00109 (PMC7052484; doi:10.3389/fcell.2020.00109)
Supplement: Supplementary file 2 [file Table_1.XLSX]

## Sheet: Sheet1
EFFECTS (Figure 1)
S7/islet vs S5/Islet - 738 DEPs (FC≥1.5, p<0.05)	S7enc[S5-S6]/islet vs S5/Islet - 1110 DEPs (FC≥1.5, p<0.05)	2w_postTX/islet vs S5/Islet - 1055DEPs (FC≥1.5, p<0.05)
SNRPC	RNF213	A2M
ZNF428	ZNRF2	ABAT
ARF4	DYNLRB1	ABCD3
SCP2	METAP2	ABCF1
TMOD1	ZFAND5	ABHD10
TAGLN	HCFC1	ABHD14B
NTPCR	SRSF5	ACADS
HEBP2	ZNF428	ACADVL
FAM136A	BIN1	ACAT1
THADA	THADA	ACAT2
SERPINB6	PEX19	ACIN1
NFU1	SNRPC	ACOT13
LSS	PRKACA	ACOT9
B4GALT4	EIF3G	ACP1
GEMIN6	QPRT	ACP2
GLO1	TAGLN	ACSF2
SGPL1	DCTD	ACSL3
NDUFB7	SIRT2	ACSL4
GLB1	HNRNPR	ACSS1
RAB3C	MYCBP	ACSS2
MAP7	PLOD2	ACTN4
GALM	LIMD1	ACTR10
MRPS36	AKAP12	ADH1B
SORT1	FAM114A1	ADH1C
GGH	TAF15	ADI1
GOLPH3	PRRC2C	ADPRHL2
UCHL3	ABCD3	ADSS
SULT1A1	TPM4	AFG3L2
PLGRKT	TBCA	AGPS
TXNDC12	PCNP	AGR2
ATP5D	CSRP2	AHSA1
HIST1H1B	BASP1	AIFM1
ACTR1B	RABGGTB	AK1
YWHAQ	ACAT2	AKAP12
NPM1	MTPN	AKAP13
BCAS2	ARRB1	AKR1A1
RPS16	HMGN1	AKR1B1
RPL28	DENR	AKR7A2
CFL2	TBC1D4	ALDH1A3
EXOSC4	SF3B4	ALDH1B1
MRPS27	PLOD3	ALDH1L2
PGP	MAPRE1	ALDH3A2
TXN	ZYX	ALDOB
DAZAP1	SAFB	AMPD2
PSMD11	ENAH	ANPEP
THYN1	UBE2K	ANXA1
SF3B5	NUP62	ANXA4
DPYSL3	TAOK2	AOX1
TPM1	CGN	AP1M2
PTMS	WBP11	AP2A1
SUGT1	FNBP1L	AP2M1
IDE	TMOD1	AP3M1
MYL12B	YBX3	APEX1
MYCBP	S100A13	API5
SNRPA1	CTSZ	APMAP
AKR7A2	DYNLL2	APOA1
FAM114A1	RANBP3	APOC3
GPS1	RCN2	APOE
FAHD1	PQBP1	APP
SIRT2	KIAA1217	APRT
PAK1	IDI1	ARCN1
TSC22D4	AVEN	ARF3
CYCS	SYAP1	ARF4
PDZK1	HEBP2	ARFIP1
FAM107B	LACTB	ARG2
RPS26	SF3B5	ARHGDIA
CORO1C	CADM1	ARID1A
ESD	FKBP1A	ARMCX2
NUBP2	RAD23A	ARPC3
MRPS16	GALM	ARSA
EIF3K	STXBP2	ASAH1
DHRS4L1	FAM169A	ASH2L
PGM1	GRPEL1	ASPH
FAM20B	NPC2	ATAD1
NUDT3	BCAM	ATP2C1
SLC25A1	SORT1	ATP5C1
RPL23A	PLIN3	ATP5D
DHX15	YY1	ATP5F1
SPR	DYNC1LI2	ATP5H
PSMF1	TXLNA	ATP5I
SURF4	VTN	ATP5J
HN1L	ADI1	ATP5L
ANXA5	MAP1S	ATP5O
SERPINB1	CLIC4	ATP6V0D1
ERH	FAM107B	ATP6V1A
RPL35	YLPM1	ATP6V1C1
PSMD14	HMOX2	ATP6V1H
NUDT21	CALM1	ATP8A1
SEC62	SPG20	ATP9A
ATP9B	LPP	ATXN2L
GPD2	TXNRD1	AVEN
GSTA5	NUDCD2	AZGP1
FASN	CALU	B4GALT4
UGDH	SERPINB9	BABAM1
IFT27	MXRA7	BAG1
MRPS14	RALGAPA2	BASP1
NAGA	TMEM165	BAX
CTSZ	C19orf43	BCAM
GTPBP1	CAPZA2	BCAP31
S100A14	SDCBP	BCAS2
TALDO1	POLDIP2	BCLAF1
TPM4	NXN	BDH1
MPST	CLCC1	BIN1
H1F0	OGFR	BLMH
TUBAL3	TMOD3	BLVRB
BDH2	MARCKS	BMS1
RPL3L	TFG	BPNT1
SERPINB9	CWF19L1	BROX
NPC2	PHF6	BTF3
SCAMP2	EIF1	BZW1
PGM3	MAVS	C14orf142
XPNPEP1	CISD2	C14orf159
COASY	NUBP1	C16orf62
IVD	TJP1	C19orf43
RAB8A	SLC12A2	C3
SPG20	PCYT2	C4A
RPL10	LCMT1	C4BPA
TAF15	C7orf50	C7orf50
TCEB1	HNRNPA0	C9orf64
SMAD4	EEF1E1	CADM1
RBM4	C14orf142	CADPS
NPC1	MORC2	CALD1
POLDIP2	NCBP1	CALM1
RPL15	KPNA4	CALU
TXNRD1	FKBP15	CAMK2D
GRN	PTPRF	CAP1
ADI1	SNRPD2	CAPN1
NDUFA7	CERS2	CAPZA1
SEC24A	FHL3	CAPZA2
CDK5RAP3	FKBP10	CAPZB
CNN3	CASK	CARKD
ABCD3	NHP2L1	CASC4
BROX	API5	CASK
CPNE3	SPAG9	CAST
SOD2	CRK	CBR4
RTN3	ATP5J	CBX3
TOR1AIP1	GANAB	CBX5
MCTS1	UBAP2L	CCDC124
ACSS2	PRMT5	CCDC47
FGB	MTAP	CCDC6
LAMP1	PSMD10	CCDC93
VAMP2	CHMP4A	CCT3
LASP1	IDE	CD2AP
RBM14	TBC1D23	CD59
ECH1	CDC5L	CD81
CCDC47	CNN3	CD9
RPL23	PDZK1	CDC5L
PLCXD3	UBQLN2	CDC73
NAA20	RCN1	CDH1
FLNC	WAC	CDV3
BLVRB	GLB1	CEBPZ
ANKFY1	CAP1	CEL
MAPRE3	PRKCD	CELA3A
AMPD2	ZCCHC17	CELA3B
RPL13A	SEC13	CERS2
TES	NDUFAF2	CES1
ABHD11	EWSR1	CFL2
TMEM65	ITPA	CGN
ISOC2	YWHAQ	CHD4
FAM98B	IRF2BP2	CHGB
NHP2L1	MAP4	CHMP2A
HIST2H2BC	NFU1	CHMP4A
CNPY2	KIAA1522	CHMP4B
S100A16	GGH	CHMP5
PGD	MAPRE2	CKMT1A
F11R	DIAPH1	CLASP2
SRM	ZNF830	CLCC1
RNASET2	MYL12B	CLIC4
DCTN2	PRMT1	CLIP1
NDUFA5	DNAJC8	CLMN
ACADM	TBCC	CLPP
GLRX5	AKAP2	CLPS
PPIA	NES	CLPTM1
MST4	HNRNPA1	CLTA
NUDT4	CASC4	CLU
CALD1	SNX1	CNN3
ALDH3A2	SF3B3	CNOT1
HSD17B4	RBM27	COBLL1
DCTD	YWHAB	COL4A1
HIST2H2BF	RPL37	COL4A3BP
EXOG	IVNS1ABP	COL6A1
GNPDA1	SRRM2	COL6A2
UBE2L3	PPM1G	COL6A3
DDT	PFDN2	COMMD4
FSCN1	BAG1	COMT
GNB2	IFT27	COPG1
PSMB5	OTUB1	COPS5
RPL14	NUP50	COPZ1
RPS12	DBN1	CORO1B
RPS5	PTMS	COX4I1
CDS2	YTHDF2	COX5A
UFD1L	CD81	COX7C
RPL18A	DFFA	CPA1
NUP54	DYNC1I2	CPA2
STRAP	RAB32	CPB1
POLDIP3	RANGAP1	CPD
ENDOD1	NMT1	CPE
PLG	FLNC	CPPED1
DDAH2	FAM49B	CPSF1
CSRP2	CAPZA1	CPSF6
GSTO1	RPS17L	CRABP1
GSS	FAHD1	CRAT
CISD2	HSPBP1	CRIP2
CORO1B	NUFIP2	CRK
RAC1	HMGN5	CRMP1
PSAT1	STRAP	CRYAB
EHD1	SEC24A	CRYZ
APOA2	ZNF207	CSDE1
PTER	SON	CSE1L
RPS23	ARFGAP1	CSNK1A1
OCIAD2	MCU	CSRP2
MYOF	PUM1	CSTF1
GAA	SNX4	CTRB2
DBI	COPS5	CTRC
DDX39B	RBM45	CTSC
ABHD14B	ARF3	CTSZ
SRSF9	PSME3	CUL4B
RDH11	PGP	CUZD1
RRP9	S100A14	CWF19L1
CAPRIN1	NDUFB7	CYB5R1
CES1	TCEA1	CYC1
PSMD9	SAMD4B	CYFIP1
ETFB	PSIP1	DBI
ITFG1	PSMD9	DBN1
HNRNPAB	COL4A3BP	DCTD
MRPL40	ITGA5	DCTN4
CHMP4B	GOLPH3	DCXR
COX7C	NACA	DDAH2
SNX12	PSMD4	DDOST
SRRM1	CEBPZ	DDT
BZW1	ENSA	DDX18
NRAS	NPC1	DDX21
ATP6V0D1	LUZP1	DDX24
ACADSB	CAST	DDX39A
POR	GSK3B	DDX39B
DDX39A	CSDE1	DDX3Y
TPM2	NUP214	DDX46
ETFA	PPP5C	DDX6
SOD1	MRPL49	DECR1
CLIP1	PPP2R2A	DENR
SAR1B	APEX1	DFFA
RAB12	KTN1	DGAT1
STX3	NUP205	DHCR7
RPS18	GOLGA4	DHRS4L1
PSME3	CAMK2G	DHX15
COX5B	EPPK1	DHX29
CMPK1	ATP2B1	DHX30
SELENBP1	SEL1L	DIAPH1
PRKCD	MDH1	DIS3
API5	MAGOHB	DKC1
MRPS10	DUT	DLG1
DUT	POLDIP3	DLGAP4
IKBKAP	PAK2	DNAJA1
STAU1	ZC3H15	DNAJB11
RPS15A	FABP5	DNAJB6
RABGGTB	PAK1	DNAJB9
BIN1	MTDH	DNAJC3
RPS3	DGAT1	DNAJC8
EFTUD2	SF3A1	DOCK7
PTPLAD1	PLXNB2	DPEP1
ANXA7	PAWR	DPYSL2
GTF2I	MCTS1	DPYSL3
C8orf47	UCHL3	DSG2
RNASE1	RELA	DST
VARS	ACOT2	DYNC1I2
SCFD1	WTAP	DYNC1LI1
QPRT	NUP133	DYNC1LI2
SCARB2	NUP35	DYNLRB1
HNRNPA1	RAD21	EBNA1BP2
RAB1A	SCP2	ECH1
SMS	DST	ECHDC1
CSNK1A1	ZC3H14	ECI1
COL4A1	CDK5RAP3	EEF1A2
TIMM44	GSTK1	EEF1E1
MRPL48	PLEKHG3	EEF1G
PPCS	ARID1A	EFTUD2
MYEF2	MLLT4	EHBP1
ARHGAP1	APP	EIF1
M6PR	ILK	EIF1AX
DECR1	SYNJ2	EIF2S3
MAOB	CDV3	EIF3G
RPS20	UBE2I	EIF3H
UGP2	DDX24	EIF3K
SLC25A13	SET	EIF4G1
HMGCL	PPM1A	EIF4H
EIF3J	GCC2	EIF5B
STT3A	B4GALT4	ELAC2
RAD23A	WNK1	EMC1
DHX29	SRSF1	EMC8
ZYX	NUP88	EML2
CAPZB	MAGED2	ENAH
GSR	LUC7L	ENDOD1
ALDH2	DBT	ENOPH1
LHPP	ERH	ENSA
MAP4	AKR1C1	EPB41L2
SPCS3	NCAM1	EPCAM
FHL1	EIF3H	EPHX1
STK24	SERBP1	EPHX2
TBC1D15	VPS37A	EPPK1
FABP5	COMMD4	EPS8L2
MRPL19	EPB41L2	ERLEC1
EIF3H	ATE1	ERLIN1
RPS3A	SYNCRIP	ERO1LB
LUC7L	PFDN5	ERP27
ERO1L	MYEF2	ERP44
SRPRB	SKIV2L	ESD
RBM26	SMARCD2	ESYT1
KTN1	LRPAP1	ETFB
NT5C3A	MRPS23	ETFDH
SYAP1	NDUFB8	EXOC1
TCP1	ATXN2L	EXOC2
SUMF2	HDGFRP3	EXOC4
CAMK2D	CRELD2	EXOC5
TARDBP	RRP9	EXOG
PRKACA	PSMC4	EXOSC4
NUDT5	CYC1	F11R
EEF1A2	NDUFA7	F2
HSD17B11	TPM1	FABP5
RAB2A	SLC3A2	FAM115C
IGHG1	SOAT1	FAM129B
KPNA4	BZW1	FAM160B1
PSMA1	SPINT1	FAM169A
CHERP	SF3A3	FAM49B
TOP2B	CYCS	FAM98B
MSN	ATP6V1H	FARSB
PQBP1	EPCAM	FASN
PCYT2	TP53BP1	FBL
SAMD4B	HDGFRP2	FBP1
PRMT1	S100A16	FDFT1
WDR1	MYO1E	FECH
DLGAP4	TPM2	FEN1
PFDN5	SYMPK	FHL1
LMO7	GSTP1	FHL2
VIM	EIF3J	FHL3
PTPN11	CDC73	FKBP10
CAP1	DNAJB6	FKBP11
ST13	SEH1L	FKBP15
PDIA3	YWHAE	FKBP1A
BTF3	DLGAP4	FKBP2
METAP1	PPP3CB	FKBP5
MYO1B	ACO1	FLII
TNPO1	CSK	FLNA
PSMB2	PDHB	FLNC
PPP2R1A	CSTF1	FLOT2
EPCAM	KLC4	FLYWCH2
BPNT1	TPD52L2	FN1
THUMPD1	SHC1	FNDC3A
S100A13	PSMB2	FOXK1
F2	ADRM1	FUCA2
CSE1L	ANKFY1	FYCO1
G3BP1	ERMP1	G3BP1
RAB32	DDX18	GALM
ARPC3	GLRX5	GALNT3
FKBP2	UBTF	GANAB
VTN	MYO1B	GATM
LIN28A	SNRPB2	GBE1
AKAP2	ABCF1	GBF1
PGLS	F11R	GC
IARS2	STAU1	GCC2
RHOT1	TCEB1	GCG
ACSL4	UBE3A	GDA
PSMB6	NUDT4	GEMIN6
SFXN1	AP3D1	GFM1
INPP1	STT3B	GFPT1
NUBP1	DTX3L	GGH
PHB2	GOLM1	GIGYF2
SPCS2	XRN2	GLB1
ACLY	IBA57	GLO1
MAT1A	PDE12	GLRX3
NDUFS5	COX5B	GLRX5
FHL2	ARG2	GNB1
ATIC	AKAP13	GNPDA1
NMT1	HSPA4	GOLGA3
FNBP1L	SPATS2L	GOLGA4
GSTP1	IDH1	GOLM1
RAP1GDS1	NUP54	GOLPH3
ALDH6A1	RAP1GDS1	GP2
YWHAG	ILF3	GPD1
IGFBP3	RNPS1	GPD1L
FKBP10	NUCB1	GPD2
IMPA2	TUBAL3	GPS1
ENAH	ARF4	GPX1
PI4KA	WARS	GRPEL1
ARCN1	SGPL1	GRWD1
NCLN	APOA1BP	GSK3B
RPL13	ZMYND8	GSN
H2AFV	AMPD2	GSR
TRIM28	AP2A1	GSS
RBKS	TES	GSTK1
PHF6	PTBP3	GSTM2
NXN	STX3	GSTM3
NDUFA4	LHPP	GSTO1
RPS24	SNX9	GSTP1
VDAC3	ATP5F1	GTF2I
LGALS1	ACSL4	GTPBP1
DOCK7	PTPN23	GYG1
SNTB1	CLASP2	H1F0
CAPZA1	DSG2	H2AFX
SPINT1	USP47	HBA1
CERS2	FAM98B	HBB
WARS	GAPVD1	HDGFRP2
TMED10	UBR4	HDGFRP3
IDH3B	ALYREF	HDHD2
RPL22	RAB11FIP1	HEATR1
CPE	NBAS	HEBP2
LLGL1	WDR33	HEXA
TMEM214	NEU1	HID1
RANBP3	ALDH1A1	HINT2
PAM	DDX46	HIP1R
CLU	RBM26	HIST1H1B
NUP133	PLG	HIST2H2BC
IGFBP7	RAVER1	HIST2H2BF
TMOD3	MYO6	HMGA1
EEF1G	DHX29	HMGN1
XRCC5	VAC14	HMGN2
FECH	CAPZB	HMGN5
AP2M1	CAPRIN1	HMOX2
SERPINA3	CUL4B	HN1L
TRIM2	TRMT10C	HNMT
SRSF4	SUGT1	HNRNPA1
HNRNPC	CYFIP1	HNRNPAB
DYNC1LI2	CPSF6	HNRNPH2
SCCPDH	EIF5B	HNRNPR
NAPG	POFUT1	HNRNPUL2
DDX21	SCAF4	HP
UBE2I	TM9SF4	HPX
NAV1	RBM17	HRSP12
MYO1E	AGPS	HSD17B4
HBB	LMCD1	HSD17B8
CPA1	CTTN	HSPA4
PLA2G1B	ITPR2	HSPB1
SAFB	PPP2R1A	HSPBP1
SOAT1	HDLBP	HSPG2
DDX24	AHSA1	HTT
ARFIP1	ADSS	HUWE1
USP7	PREP	IBA57
NNMT	ACTN4	ICAM1
COL4A3BP	TSC22D4	IDE
AVEN	CTSC	IDH1
RPL37	SART1	IDH2
TBL1XR1	TOMM34	IDI1
EIF5	GBF1	IFT27
ZCCHC17	HEXA	IGF2BP2
APMAP	DYNC1LI1	IGF2R
FYCO1	NUDCD1	IGFBP2
KIAA1522	PBLD	IGFBP7
U2AF2	RTCA	IGHA1
NUP50	HNRNPLL	IGHG1
SART1	LTA4H	IGHG2
IGKC	EIF4G1	IGHM
SNX3	HIBADH	IGKC
SRSF7	RBM14	IKBKAP
NBAS	CHD4	ILF2
GCC1	TMEM87A	ILF3
ZNF207	DKC1	ILK
CD9	SNRNP200	ILKAP
MUT	CAPN1	IMMT
CARKD	PDS5A	IMPA2
TXLNA	ACIN1	IMPACT
NDUFV1	PGD	INS
ZC3H15	SNRPA1	INTS3
NUFIP2	MRPL39	IPO7
SDHA	ARMCX2	IRF2BP2
AMY2A	EHD1	ISOC2
ZMPSTE24	BAX	ITFG1
ARL6IP4	ITGA2	ITGA2
PLXNB2	TRIP6	ITGA3
LRRFIP1	RNF214	ITIH4
CYB5R1	HNRNPAB	ITPA
WAC	LAD1	ITPR2
C4BPA	CORO1C	ITPR3
HADHA	PSMD6	IVNS1ABP
ATAD3A	POSTN	JUNB
TCERG1	ARFIP1	KIF13B
FAM169A	ASH2L	KIAA1217
TBL2	MSI2	KIAA1324
ATL3	NDUFB5	KIAA1522
HDGFRP3	HSPG2	KLC4
CRYAB	EIF5	KLK1
AOX1	ODR4	KPNB1
C4A	TERF2IP	KTN1
PCP4	PSAT1	LACTB
HEATR1	SRP19	LAD1
SCG5	ENOPH1	LAMB1
PRKAR2A	NAA20	LAMC1
POLR2A	NCLN	LAMC2
MAPRE2	GLOD4	LAMP1
SHC1	DDX39B	LASP1
MARCKS	NAE1	LCMT1
DIP2B	MACF1	LCN2
DPP7	PSMC5	LDHB
APEX1	DIS3	LGALS3BP
ECHDC1	ECHDC1	LGALS4
SKIV2L	ZRANB2	LHPP
CAST	CHAMP1	LIMA1
ATAD1	CCDC6	LLGL1
GOLGA3	THRAP3	LMCD1
CBR4	GFPT1	LMF1
ECI1	BCAS2	LNPEP
UBTF	GMPS	LPCAT3
TMEM165	RCC2	LPP
PTMA	LIN28A	LRBA
RALGAPA2	MST4	LRPAP1
ZMYND8	CARKD	LRRFIP1
ACAD9	EEF1B2	LSS
HADHB	DHCR7	LTA4H
DYNC1I2	RPS6KA3	LUC7L
CLASP2	RPL35	LUZP1
ODR4	PCP4	LYPLAL1
DGAT1	ZNF638	M6PR
ATP5H	SMARCC2	MAGED2
ARHGDIA	BLMH	MAGOHB
ITPR3	DNM1	MAOA
GALNT3	CLPP	MAOB
MECP2	ARPC5	MAP1A
PF4	PSMD1	MAP1S
SUCLG2	NUMA1	MAP2K1
PLP2	UGDH	MAP2K3
NAP1L4	EFTUD1	MAP4
AK2	LMNB1	MAPK1
MAOA	TJP2	MAPRE1
ERP27	BROX	MAPRE2
NPTX2	METTL3	MAPRE3
AGR2	DNAJB11	MARCKS
ALDH1B1	RPS12	MAT1A
GRPEL1	TXNDC12	MCCC1
NCBP1	AARSD1	MCEE
RBM33	ILKAP	MCU
TERF2IP	NOP2	MECP2
ARL6IP5	HEXB	METAP2
FKBP5	LASP1	METTL3
DIS3	STAU2	METTL7A
GSK3A	TBL3	MIF
ALDH1A1	ATP6V1E1	MIPEP
HNMT	VIM	MLLT4
STXBP5	MRPL43	MOGS
CLCC1	RAB4A	MORC2
NDUFB5	NCK2	MPST
APOL2	FKBP5	MRPL1
NARS2	LDHB	MRPL19
HSPBP1	EXOC4	MRPL22
RAB21	STOML2	MRPL39
GCC2	WDR43	MRPL49
TNKS1BP1	IDH3B	MRPS16
EXOC1	GOLGA3	MRPS23
TBCC	H2AFY2	MRPS27
LAD1	SERPINB6	MRPS36
ACTR10	ACSL3	MRPS5
MT1F	DNAJA1	MRPS9
FN1	CPD	MST4
SCLY	CCDC124	MT-CO2
AARSD1	FUCA2	MT1F
DKC1	ILF2	MTA2
ALDH1L2	RPS14	MTAP
GPD1	TMEM214	MTCH2
TFAM	VWA5A	MTDH
CBX5	SDC4	MTPN
APP	EXOSC4	MUC1
GRWD1	SOD2	MUC13
NUP205	RRBP1	MVP
SART3	TKT	MX1
HNRNPA0	CCDC47	MXRA7
COL6A2	PSMD2	MYCBP
TAOK2	YWHAG	MYEF2
HNRNPR	IKBKAP	MYH10
TBL3	IMPACT	MYL12B
CSTF2T	RBBP4	MYO1B
ADH1B	SPTLC1	MYO1C
TM9SF4	GSN	MYO6
HCFC1	GTPBP1	MYOF
EIF1	CPSF1	NACA
OGFR	TTLL12	NAE1
DHX30	NDUFV1	NARS2
HPRT1	AP2M1	NAT10
PGK1	MECP2	NAV1
ATE1	SVIL	NBAS
PRMT5	NUDT21	NCBP1
ENSA	NSUN2	NCK2
CADPS	RBM4	NCLN
WASH1	RAD50	NDUFA2
ACADS	TRIM2	NDUFA4
METTL3	TPT1	NDUFA5
MRPL49	SYN1	NDUFA7
NUP62	DCTN4	NDUFAF2
ATP8A1	QDPR	NDUFB11
FNDC3A	USP5	NDUFB3
PEX19	TMEM65	NDUFB4
SMARCD2	UBA2	NDUFB8
TOM1L1	SEC24D	NDUFB9
RTCA	MANF	NDUFS2
PTRH2	G3BP1	NDUFS5
SRSF5	BTF3	NDUFS7
RAD21	MYOF	NENF
NIPSNAP3A	PRPF19	NES
TCEAL5	GTF2I	NEU1
ARSA	C11orf54	NFKB1
MAVS	FARP1	NFKB2
SCAF4	FDFT1	NFU1
LNPEP	TMED9	NFXL1
PSMA2	IMPA1	NID1
TRIO	PSMC3	NIPSNAP3A
ATP6V1E1	GSK3A	NNT
CD44	GIGYF2	NOP2
H2AFX	U2AF2	NPC1
ABHD10	HTT	NPC2
APOE	BABAM1	NPM1
TXNRD2	GLRX3	NPTX2
C14orf142	CSTF2T	NRAS
LCMT1	PAFAH1B2	NSUN2
C7orf50	GEMIN6	NUBP1
DBT	PSMB1	NUBP2
ECHDC3	RBM33	NUCB1
SYN1	TXN	NUCB2
PDS5B	MAP1B	NUCKS1
PCSK2	HMGA1	NUDCD1
NUP35	LPCAT3	NUDCD2
FBL	ATP2C1	NUDT3
RELA	HN1L	NUDT4
ACSF2	DDX6	NUDT5
COA3	SUPT16H	NUFIP2
TGM2	PEBP1	NUMA1
ACAT1	TRIO	NUP133
CHGB	PDCD4	NUP160
MTDH	TIMM44	NUP205
C9orf142	POLR2A	NUP214
ZNF830	ASPH	NUP35
DNAJC8	OSBPL8	NUP37
HINT2	SNRPA	NUP50
ZFAND5	HEATR1	NUP54
DENR	EIF2B3	NUP62
DSG2	VAMP8	NUP88
SEC13	PGLS	NXN
MRPL43	DDX3Y	NAA15
HADH	AKR1B1	OCIAD2
SMARCC2	MRPS9	OGFR
LAMB1	CKB	OSBPL8
PRKAR2B	CHERP	OTUB1
SEH1L	CYB5A	PABPC4
MRPS5	ARL6IP4	PAFAH1B1
MBOAT7	FAM120A	PAICS
CALM1	SMARCB1	PAK1
RTN4	MRPL48	PAM
PURB	CMAS	PAWR
IGFBP2	CBX3	PBLD
SAMHD1	DNAJC7	PC
SLK	RPS26	PCM1
LMAN1	PSMD12	PCNA
ACAD8	TXNL1	PCNP
CNPY3	DCTN2	PCSK1
IGHG3	ACTR1B	PCSK1N
HIBADH	UNC45A	PCSK2
TBC1D4	SLK	PCYT2
LAMC1	ITPR3	PDCD11
ZNRF2	FHL1	PDHB
PDE12	CD2AP	PDIA2
ITGB4	TPP2	PDXK
MRPS23	TNKS1BP1	PDXP
CLPP	ESD	PDZK1
PNLIPRP1	TCOF1	PEX19
PGRMC1	GRWD1	PF4
COPZ1	GLO1	PFDN1
PURA	SDHA	PFDN2
PPM1H	NUDT3	PFKFB2
MAP1B	XRCC6	PFKFB3
PDIA2	TMEM63C	PFKM
FBN1	PKM	PFN2
MRPL39	LRRFIP1	PGM2
RAVER1	HNRNPUL2	PGP
POSTN	SNTB1	PGRMC1
PALM3	PDIA4	PHB2
CRIP2	TBL1XR1	PHF6
POFUT1	USP14	PHPT1
SYCN	PSMD11	PIN1
PNLIP	COPG1	PITHD1
CD81	FHL2	PLA2G1B
BCAM	GFM1	PLCXD3
BMS1	QKI	PLEC
LPCAT3	CNOT1	PLEKHG3
S100A6	LMO7	PLGRKT
TMEM109	ZC3HAV1	PLIN3
C9orf64	ATAD1	PLOD2
FBP1	STT3A	PLOD3
VPS26B	PUF60	PLP2
MIPEP	TOR1AIP1	PLXNB2
SPINK1	CSTB	PNLIP
TNS3	LRRC59	PNLIPRP2
SEL1L	RNMT	PNN
GANAB	EIF2S3	POLDIP2
ITGA2	IGF2R	POLDIP3
IGFBP5	SCLY	POLR2A
TRMT10C	FLOT2	POLR2C
BCAT2	ALDH2	POSTN
HSPB1	ERLIN1	PPA2
NUCKS1	SEC31A	PPIA
GOT2	ETFA	PPIB
GCG	BAG5	PPM1G
IGHA1	CALD1	PPM1H
SCG3	TOP2B	PPP2R1A
CDH1	DNAJC3	PPP2R2A
SVIL	HMGCL	PPP5C
PLOD2	GMPPA	PQBP1
CRABP1	ACSF2	PREP
MORC2	SPCS3	PRKACA
STXBP1	CNPY2	PRKCD
OSBPL8	SOD1	PRKDC
CTRC	FLNA	PRMT1
FAM129A	MAT2A	PRMT5
AZGP1	CLGN	PROSC
ERO1LB	IGFBP7	PRPF19
ITPR2	DPYSL3	PRPF40A
COL6A3	PPP1R8	PRPF8
NID1	PSMF1	PRRC2C
PFN2	NAT10	PRSS1
NDUFB11	EBNA1BP2	PRSS2
MX1	SMARCA4	PSIP1
NDUFB8	ALDH1A3	PSMA1
HID1	NID1	PSMB1
ADAMTS1	SYCN	PSMB2
ALDH1A3	ERP44	PSMB3
MAP2	FOXK1	PSMB5
CHGA	ATP5D	PSMB6
GP2	PARP9	PSMC2
HSPG2	ANPEP	PSMC3
TNS1	TCEAL5	PSMC4
MUC13	TOLLIP	PSMC5
CKMT1A	SRSF9	PSMD1
TECR	LRBA	PSMD10
PCSK1N	U2SURP	PSMD11
APOC3	ACTR1A	PSMD12
DPEP1	MYO18A	PSMD14
MUC1	NADK2	PSMD2
IGHM	INPP1	PSMD4
SCG2	UBE2L3	PSMD6
CD59	ZMPSTE24	PSME4
COBLL1	SRA1	PTBP3
NCAM1	AK2	PTER
IGHG2	POLR2C	PTMA
SDC4	MAP2K1	PTMS
	CLIP1	PTPN11
	TLN2	PTPN23
	PALM3	PTPRF
	RPS7	PTPRN2
	FSCN1	PTRF
	PDS5B	PURA
	MRPS16	PURB
	ELAC2	PXDN
	ARHGAP1	QPRT
	SF3B1	RAB11B
	FNDC3A	RAB27A
	HSP90AB1	RAB2A
	PSMB3	RAB2B
	GNB2	RAB32
	MMAB	RAB3A
	ALDH1B1	RAB3B
	C14orf166	RAB3C
	PAICS	RAB3D
	ACOT9	RAB3GAP2
	RAB1A	RAB4A
	PCNA	RAB7A
	KPNB1	RAB8A
	SUB1	RABGGTB
	RPS19	RAC1
	UBXN4	RAD21
	UGP2	RAD50
	HNRNPH2	RAN
	RTN4	RANGAP1
	NUP210	RAP1GDS1
	GGA2	RAVER1
	TXNRD2	RBBP4
	ATP6V1C1	RBKS
	ACTR10	RBM14
	PLGRKT	RBM17
	PSMC2	RBM33
	GPS1	RBM4
	TCERG1	RBM47
	EXOC1	RBP4
	RAB8A	RCC2
	ROCK2	RCN1
	SRRM1	RCN2
	RAB2B	REG1A
	FAM160B1	REG3A
	CALR	RELA
	SPTBN2	RNASE1
	EHBP1	RNASET2
	EMC1	RNF213
	CENPV	RNF214
	TRIM28	RNMT
	BDH1	RNPS1
	VDAC2	ROCK2
	GAA	RPL10
	RPA1	RPL13
	CNP	RPL13A
	SLC25A13	RPL14
	RDX	RPL15
	MYH10	RPL17
	DDT	RPL18A
	EPS8L2	RPL23
	DHX15	RPL23A
	RNASE1	RPL26
	FYCO1	RPL27
	PURB	RPL28
	CSE1L	RPL34
	TBC1D15	RPL37
	XRCC5	RPL38
	SCAMP2	RPL3L
	DNAJC11	RPN1
	HSD17B4	RPS11
	HIST1H3A	RPS15A
	RAB3GAP2	RPS18
	RPL22	RPS19
	NFKB2	RPS20
	MCCC1	RPS23
	ATP5I	RPS24
	EXOC2	RPS25
	MPST	RPS3A
	ESYT1	RPS4X
	HIST1H4A	RPS5
	SERPINA1	RPS6KA3
	ACAT1	RRBP1
	ECHS1	RRP9
	MAOB	RTN1
	ATP6V0D1	RTN3
	SCCPDH	RTN4
	EHD4	S100A10
	SORBS2	S100A13
	RNASET2	S100A14
	FAM129B	S100A16
	ASS1	S100A6
	TWF1	SACM1L
	GNAS	SAFB
	MIF	SAMD4B
	GPD1L	SARDH
	PRKAR2A	SARS
	RBM47	SART3
	PHB2	SCAF4
	DARS	SCCPDH
	COL6A1	SCFD1
	SFXN1	SCG2
	PFKM	SCG3
	MUC13	SCG5
	PPY	SCLY
	MSN	SCP2
	PLEC	SCRN1
	CYFIP2	SCYL1
	PSMB6	SDCBP
	HSD17B8	SDHA
	DHRS4L1	SEC11C
	PDK3	SEC13
	C14orf159	SEC24A
	EML2	SEC24D
	ACADVL	SEC62
	APOA1	SEL1L
	TPP1	SERPINA1
	RAB2A	SERPINA3
	MRPL40	SERPINB1
	NDUFA5	SERPINB6
	HIP1R	SERPINB9
	CMPK1	SF3A1
	RPL37A	SF3A3
	ETFB	SF3B1
	PSMA1	SF3B3
	VDAC3	SF3B4
	LNPEP	SF3B5
	SEC11C	SGPL1
	IMMT	SHC1
	HDHD2	SIRT2
	KNG1	SIRT3
	ANXA1	SKIV2L
	ATP5L	SLC12A2
	NIPSNAP3A	SLC25A12
	THUMPD1	SLC25A6
	TMEM109	SLC3A2
	RPL28	SLK
	DECR1	SMARCA5
	A2M	SMARCB1
	RPS27A	SMARCC2
	TMED10	SMARCD2
	GSS	SNRNP200
	DIP2B	SNRNP70
	METTL7A	SNRPA
	SLC25A12	SNRPA1
	IPO7	SNRPB2
	APOA4	SNRPC
	SH3GLB2	SNRPD2
	APRT	SNX12
	M6PR	SNX3
	PGRMC1	SNX4
	RPS16	SNX9
	CADPS	SOAT1
	PNN	SOD1
	TGM2	SOD2
	C16orf62	SORBS2
	DLG1	SORT1
	EIF3M	SPAG9
	GNB1	SPG20
	ACOT13	SPINK1
	EPHX1	SPINT1
	IGHM	SPR
	ATP5O	SPTBN2
	COMT	SPTLC1
	LGALS1	SQRDL
	SRSF3	SRA1
	TMEM33	SRM
	PDXP	SRRM2
	OCIAD2	SRSF4
	SACM1L	SRSF5
	NDUFB9	SRSF7
	CLU	SRSF9
	MRPL22	SST
	MAT1A	STARD10
	PRDX5	STAU1
	VAT1L	STAU2
	IDH2	STOML2
	MTCH2	STRAP
	NUCB2	STT3B
	CHMP5	STXBP2
	PNLIP	STXBP5
	CD44	SUB1
	GYG1	SUCLA2
	DDOST	SUCLG1
	C4A	SUCLG2
	PFKFB3	SUGT1
	NAP1L4	SUMF2
	SCGN	SVIL
	RPL18A	SYAP1
	PRPF40A	SYN1
	RPS4X	SYNCRIP
	PTRF	SYNJ2
	SUCLG1	SYNPO
	SUCLA2	SYT7
	RBKS	TAF15
	SAR1B	TAGLN
	SYNPO	TAGLN3
	IGFBP2	TALDO1
	HRSP12	TARDBP
	NNMT	TBC1D23
	NDUFS5	TBC1D4
	UBE2N	TBCA
	BCAP31	TBCC
	FECH	TBL1XR1
	HMGN2	TBL3
	ADH1B	TCEA1
	SYT7	TCEAL5
	LGALS4	TCERG1
	SKIV2L2	TCOF1
	MVP	TES
	PFDN1	TFAM
	FN1	TGM2
	PCSK2	THADA
	S100A6	THRAP3
	TF	TIMM13
	RPL10	TIMP1
	ABHD14B	TIMP2
	RUVBL2	TJP1
	CLTA	TLN2
	CRYZ	TM9SF4
	EEF1A2	TMCO1
	VPS36	TMED10
	RAB3A	TMED9
	EIF3F	TMEM109
	PRSS2	TMEM165
	ATP5C1	TMEM55B
	ARL6IP5	TMEM63C
	RAB27A	TMOD1
	SNX12	TMOD3
	STX1A	TNKS1BP1
	RPL13A	TNPO1
	HPX	TNS1
	PSMC6	TNS3
	CHMP2A	TOMM34
	IMPA2	TOMM40
	KIAA1324	TOP2B
	TMCO1	TOR1AIP1
	RPL3L	TP53BP1
	SQRDL	TPD52
	RPS24	TPM1
	RPS5	TPM2
	MT-CO2	TPM4
	NDUFS7	TPP1
	CHGA	TPP2
	MRPL45	TRIM2
	EEF1G	TRIM28
	CELA3A	TRIP6
	C9orf64	TRMT10C
	TAGLN3	TSC22D4
	KIF13B	TSPAN31
	PITHD1	TTC1
	CORO1B	TTLL12
	LYPLAL1	TTR
	PROSC	TUBA4A
	TUBA4A	TUBA8
	NRAS	TUBAL3
	RPL15	TUBB2A
	IGHG3	TUBB4B
	SERPINA3	TWF1
	IGFBP5	TXN
	CRAT	TXNL1
	CHGB	TXNRD1
	PCSK1N	U2AF2
	COL6A3	U2SURP
	BMS1	UBA2
	DPEP1	UBAP2L
	RGN	UBE2I
	PDXK	UBE2K
	ARSA	UBE2L3
	TMEM55B	UBE2N
	SCG2	UBE3A
	RHOT1	UBQLN2
	TUBA8	UBR4
	RPS23	UBTF
	MRPL19	UCHL3
	SRSF7	UGP2
	RPL13	UNC45A
	RPS18	UQCRFS1
	DAZAP1	USP14
	CEL	USP7
	SLC25A6	VAT1
	IGLL5	VAT1L
	TTR	VCP
	IGHA1	VDAC3
	CLMN	VGF
	IGHG1	VIM
	PRSS1	VPS35
	TACSTD2	VPS36
	GATM	VPS4B
	ALDH1L2	VTN
	COA3	WAC
	MAP2K3	WARS
	GCG	WASH1
	PPM1H	WBP11
	REG3A	WDR43
	PKP3	WNK1
	PDIA2	WTAP
	ITGA3	XPNPEP1
	TPSAB1	XRCC5
	FAM20B	XRCC6
	H1F0	XRN2
	RPS3A	YBX3
	ALDH16A1	YLPM1
	PLP2	YTHDF2
	ECHDC3	YWHAB
	SCG5	YWHAE
	IGFBP3	YWHAQ
	PHPT1	YY1
	C4BPA	ZC3H14
	VGF	ZC3H15
	ATP8A1	ZC3HAV1
	C3	ZCCHC17
	RPL17	ZFAND5
	PTPRN2	ZMPSTE24
	FAM115C	ZNF207
	TIMP1	ZNF638
	GDA	ZNF830
	SPCS2	ZNRF2
	CPE	AARSD1
	TTC1
	LCN2
	APOE
	RPS15A
	INS
	RPL26
	CRIP2
	RPL27
	FEN1
	CD9
	ICAM1
	MAOA
	SCG3
	ITGB4
	HINT2
	CDH1
	MRPS10
	GC
	H2AFX
	TIMP2
	HIST2H2BF
	TSPAN31
	SPINK1
	F2
	PCSK1
	PNLIPRP2
	TOMM40
	TUBB4B
	SST
	RPS25
	RPL14
	CTRC
	PSMA2
	HIST1H1B
	RPL38
	CD59
	MAP1A
	CLPS
	HIST2H2BC
	COBLL1
	ERP27
	RBP4
	APOC3
	PFKFB2
	GP2
	HBA1
	NARS2
	PTPRN
	EXOC5
	KLK1
	IGKC
	IGHG2
	RPL34
	HBB
	SARDH
